# Supplementary material
Source: publisher figshare collection journal article supplement (https://frontiersin.figshare.com/ndownloader/files/17710415)
Supplement: Supplementary file [file 17710415]

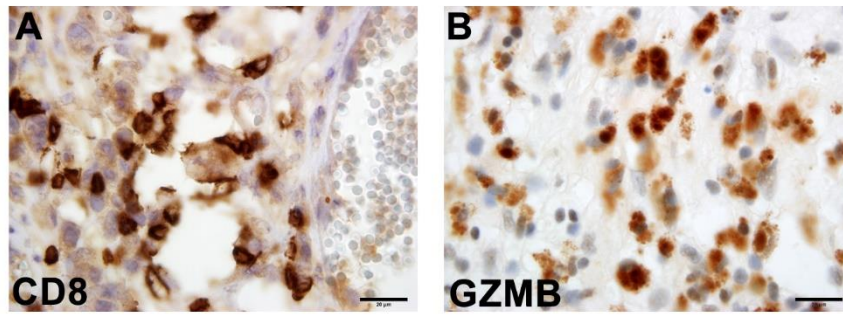

**Supplementary Figure 3. *In-situ* tumor cell lysis.** In areas of CD8<sup>+</sup> lymphocytes infiltration (A), tumor cells were full of granzyme B<sup>+</sup> granules (B), many of them in the nuclei. Original magnification: 1000X. Scale bars= 20μm.
